# Supplementary material
Source: MDPI journal article supplement (https://www.mdpi.com/2036-7481/14/1/33)
Supplement: s1 [file s1]

## Supplementary Data

| GISAID identifier | Sequencing platform        | Collection date | Sequencing facility                                                                             |
|-------------------|----------------------------|-----------------|-------------------------------------------------------------------------------------------------|
| EPI_ISL_452363    | Oxford Nanopore<br>GridION | 31 Jan 2020     | Laboratory of Infectious Diseases Center of Beijing Ditan Hospital                              |
| EPI_ISL_452361    | Oxford Nanopore<br>GridION | 11 Feb 2020     | Laboratory of Infectious Diseases Center of Beijing Ditan Hospital                              |
| EPI_ISL_1069206   | Oxford Nanopore<br>MinION  | 26 Jan 2020     | Microbiology Laboratory, Lu'an Center for Disease Control and Prevention, Anhui                 |
| EPI_ISL_413017    | Illumina MiSeq             | 8 Feb 2020      | Department of Microbiology, Institute for Viral Diseases, College of Medicine, Korea University |
| EPI_ISL_451325    | Oxford Nanopore<br>MinION  | 31 Jan 2020     | West China Hospital of Sichuan University                                                       |
| EPI_ISL_451394    | Oxford Nanopore<br>MinION  | 3 Feb 2020      | West China Hospital of Sichuan University                                                       |
| EPI_ISL_451390    | Oxford Nanopore<br>MinION  | 23 Jan 2020     | West China Hospital of Sichuan University                                                       |
| EPI_ISL_451322    | Oxford Nanopore<br>MinION  | 1 Feb 2020      | West China Hospital of Sichuan University                                                       |
| EPI_ISL_451389    | Oxford Nanopore<br>MinION  | 30 Jan 2020     | West China Hospital of Sichuan University                                                       |
| EPI_ISL_451377    | Oxford Nanopore<br>MinION  | 8 Feb 2020      | West China Hospital of Sichuan University                                                       |
| EPI_ISL_451330    | Oxford Nanopore<br>MinION  | 29 Jan 2020     | West China Hospital of Sichuan University                                                       |
| EPI_ISL_451319    | Oxford Nanopore<br>MinION  | 27 Jan 2020     | West China Hospital of Sichuan University                                                       |
| EPI_ISL_451320    | Oxford Nanopore<br>MinION  | 27 Jan 2020     | West China Hospital of Sichuan University                                                       |
| EPI_ISL_451353    | Oxford Nanopore<br>MinION  | 27 Jan 2020     | West China Hospital of Sichuan University                                                       |
| EPI_ISL_451076    | Oxford Nanopore<br>MinION  | 8 Feb 2020      | West China Hospital of Sichuan University                                                       |

|                |                               |             |                                                                                          |
|----------------|-------------------------------|-------------|------------------------------------------------------------------------------------------|
| EPI_ISL_454919 | Oxford Nanopore<br>MinION     | 3 Feb 2020  | Wuhan Chain Medical Labs (CMLabs)                                                        |
| EPI_ISL_462306 | Illumina MiSeq                | 14 Feb 2020 | National Public Health Laboratory, National Centre for Infectious<br>Diseases, Singapore |
| EPI_ISL_493179 | Oxford Nanopore<br>PromethION | 26 Jan 2020 | National Virus Resource Center, Chinese Academy of Sciences, Wuhan                       |
| EPI_ISL_493180 | Oxford Nanopore<br>PromethION | 26 Jan 2020 | National Virus Resource Center, Chinese Academy of Sciences, Wuhan                       |
| EPI_ISL_493182 | Oxford Nanopore<br>PromethION | 26 Jan 2020 | National Virus Resource Center, Chinese Academy of Sciences, Wuhan                       |

**Table S1** Sequencing platforms and facilities used to sequence the 20 intermediate genomes  
Sequencing information was derived from the GISAID entry for each genome.

EPI\_ISL\_451313, EPI\_ISL\_451314, EPI\_ISL\_451315, EPI\_ISL\_451316, EPI\_ISL\_451321,  
 EPI\_ISL\_451326, EPI\_ISL\_451327, EPI\_ISL\_451328, EPI\_ISL\_451329, EPI\_ISL\_451331,  
 EPI\_ISL\_451334, EPI\_ISL\_451338, EPI\_ISL\_451344, EPI\_ISL\_451345, EPI\_ISL\_451346,  
 EPI\_ISL\_451354, EPI\_ISL\_451356, EPI\_ISL\_451357, EPI\_ISL\_451359, EPI\_ISL\_451360,  
 EPI\_ISL\_451365, EPI\_ISL\_451369, EPI\_ISL\_451370, EPI\_ISL\_451371, EPI\_ISL\_451374,  
 EPI\_ISL\_451376, EPI\_ISL\_451378, EPI\_ISL\_451379, EPI\_ISL\_451380, EPI\_ISL\_451381,  
 EPI\_ISL\_451382, EPI\_ISL\_451384, EPI\_ISL\_451385, EPI\_ISL\_451386, EPI\_ISL\_451387,  
 EPI\_ISL\_451388, EPI\_ISL\_451391, EPI\_ISL\_451392, EPI\_ISL\_451395, EPI\_ISL\_451398,  
 EPI\_ISL\_454930, EPI\_ISL\_454931, EPI\_ISL\_454932, EPI\_ISL\_454933, EPI\_ISL\_454934,  
 EPI\_ISL\_454935, EPI\_ISL\_454936, EPI\_ISL\_454937, EPI\_ISL\_454980, EPI\_ISL\_454981,  
 EPI\_ISL\_455374, EPI\_ISL\_455375, EPI\_ISL\_455386, EPI\_ISL\_455391

**Supp Data S1** Genomes from the study by Lin et al (2020) that were included in the analysis of Pekar et al
